# Supplementary material for: Melatonin Maintains Fruit Quality and Reduces Anthracnose in Postharvest Papaya via Enhancement of Antioxidants and Inhibition of Pathogen Development
Source: MDPI journal article supplement (doi:10.3390/antiox11050804), 2022-04-20
Supplement: s1 [file s1]

## Supplementary Figures

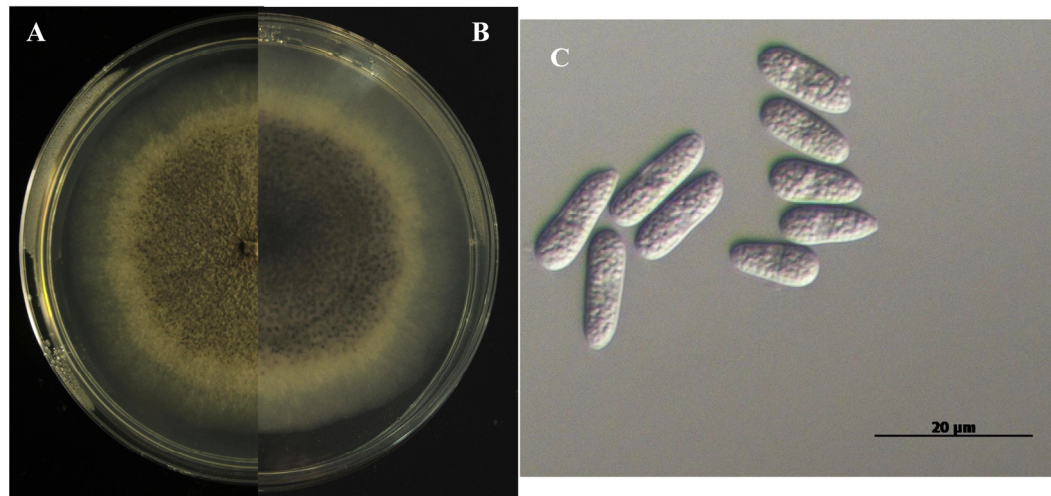

**Figure S1.** Morphological characteristics of the pathogen. A-B, Conony on PDA for 7 days post inoculation, upper and reverse side; C, Conidia.

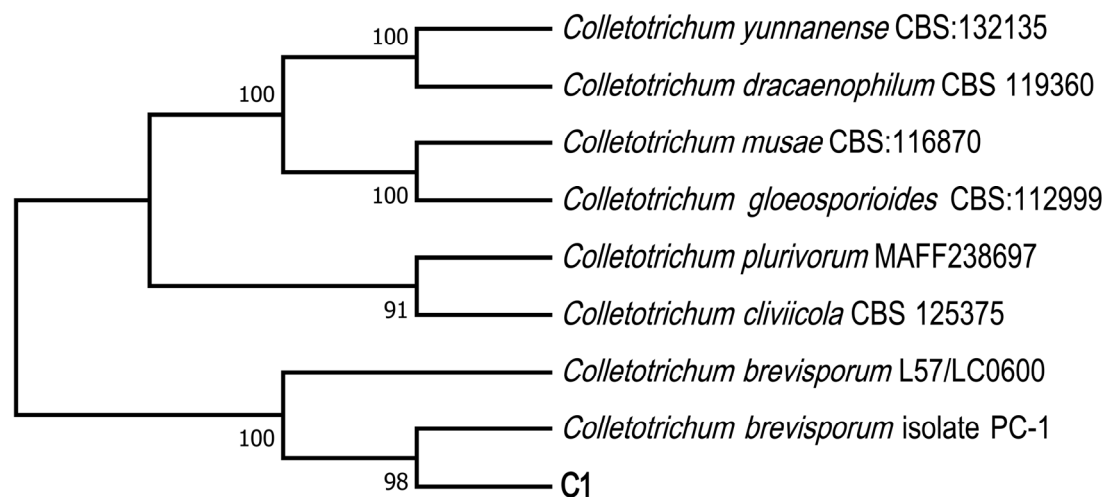

**Figure S2.** The phylogenetic tree generated by combination of *ITS* region, *GAPDH* and *ACT* genes from different *Colletotrichum* spp.. C1 indicted the isolation used in the present work. The accession numbers of *ITS*, *GAPDH* and *ACT* from different *Colletotrichum* spp. Strains were used as described in Damm et al. (2019). The sequences were extracted from NCBI. The cloned gene sequences were blasted in NCBI database, and all these sequences showed 100% identity with the corresponding gene sequences of different *Colletotrichum brevisporum* strains, with different coverage. The phylogenetic tree was constructed by MEGA 7 using the three

sequence datasets and other corresponding sequences from different *Colletotrichum spp.*, by the Neighbour-Joining bootstrap with Maximum Likelihood distances (10000 replicates).

**Supplementary Table S1 Primers used in present work.**

| Genes | Primer name | Primer sequence (5'-3')         | Length of sequence<br>(bp) |
|-------|-------------|---------------------------------|----------------------------|
| ACT   | ACT-521     | ATG TGC AAG GCC GGT TTC GC      | 281                        |
|       | ACT-783     | TAC GAG TCC TTC TGG CCC AT      |                            |
| GAPDH | GDF         | GCC GTC AAC GAC CCC TTC ATT GA  | 252                        |
|       | GDR         | GGG TGG AGT CGT ACT TGA GCA TGT |                            |
| ITS   | ITS4        | TCC TCC GCT TAT TGA TAT GC      | 614                        |
|       | ITS5        | GGA AGT AAA AGT CGT AAC AAG G   |                            |

### Supplementary data: Gene sequences of *ITS*, *GAPDH* and *ACT*

*ITS*

TTCCCCCCCCCCCCCCCCCTCAAGCTTAAGTTCAGCGGGTATTCCCTACCTGATCCGAGGT  
CAACCTTGATAAATTGGGGGGTTTTACGGCAGGAGTCCCTCCGGATCCCAGTGCGAGGTGG  
TATGTTACTACGCAAAGGAGGCTCCGGGAGGGTCCGCCACTGTATTTTCGGGGCCTACGAA  
GCCGTAGGGCCCCAACGCCAAGCGGTGCTTGAGGGTTGAAATGACGCTCGAACAGGCATG  
CCCGCCAGAATGCTGGCGGGCGCAATGTGCGTTCAAAGATTTCGATGATTCACTGAATTCTG  
CAATTCACATTACTTATCGCATTTTCGCTGCGTTCCTTCATCGATGCCAGAACCAAGAGATCCGT  
TGTTAAAAGTTTTGATTATTTGCTTGTACCACTCAGAAGAGACGTCGTTGCAATAGAGTTTA  
GTGGTCCGCCGGCGGGTGGGGCGCGCCGAGAAGGCGGCTCCGGGCGCCGAGCTGGGCT  
CCGGCTGCCCGCCGAGGCAACGTTTGAGGTATGTTCAAAAGGGTTATAAGGAGCGGTAAC  
TCGATAATGATCCCTCCGCTGGTTCACCAACGGAGACCTTGTGTTTTTTTTTTTTTTCACACA  
A

*GAPDH*

TTTGCCGTCATTGCCCCCTTCATTGAGACCAAGTACGCTGTGAGTAGCACCTCTCCaAGCTC  
GCCACGCCCCGCCACCCCTCAGTCGCGAACGTACGCTCTAGCTGTCGATAACATGCGAAATC  
AATCAAGCTCCAATGCCGTGAGCGATTGATGGGGTCGGCGTGGTGGGGTTGAATATCATGC  
AAAGGACTATGGTCGCTGACACGCCATCCGCAGGCCTACATGCTCAAGTCGAAACTCCACC  
CAAGGAT

*ACT*

TGTTATGTGCAAGccCGGTTTCGCCGGTGacGatgcgccCAGAGCTGTCTTCcgtaAGTCTTCCCG

CCTGCAGACCGCAATCTCGCCCCGTCAGGGGGCATCGAGATTTGCGGCCGGCTTCCGCTCG  
CACACTTGGATGCTGACAGCTTCGCAGCCTCCATTGTTGGTCGCCCTCGCCACCATGGGTAT  
GTTTCCTCTCGCCGCGGCAATTTCTCGCGTTTCCGTCGCCTCCTAACAAATgggcagtatcatGATT  
GGTATGGGCCAGAVGGGACTCGTAA

## Reference

1. Damm, U.; Sato, T.; Alizadeh, A.; Groenewald, J.Z.; Crous, P.W. The *Colletotrichum dracaenophilum*, *C. magnum* and *C. orchidearum* species complexes. *Stud. Mycol.* **2019**, *92*, 1–46. <https://doi.org/10.1016/j.simyco.2018.04.001>.
